# Supplementary material
Source: Springer Nature journal article supplement (https://www.springermedizin.de/resource/supplementary/12885_2013_4177_MOESM1_ESM.pdf/9465664)
Supplement: MOESM1 [file 9465664]

**A** Distant disease-free survival (DDFS) by St Gallen molecular subtypes in primary tumours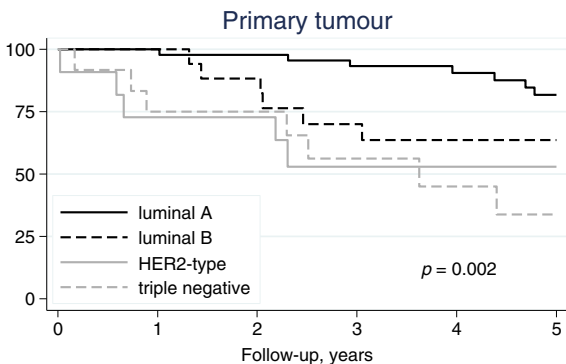

Numbers at risk

|                 |    |    |    |    |    |    |
|-----------------|----|----|----|----|----|----|
| luminal A       | 45 | 45 | 43 | 41 | 33 | 26 |
| luminal B       | 17 | 17 | 15 | 11 | 9  | 7  |
| HER2-type       | 11 | 8  | 8  | 5  | 5  | 4  |
| triple negative | 12 | 9  | 8  | 5  | 4  | 3  |

**B** Overall survival (OS) by St Gallen molecular subtypes in primary tumours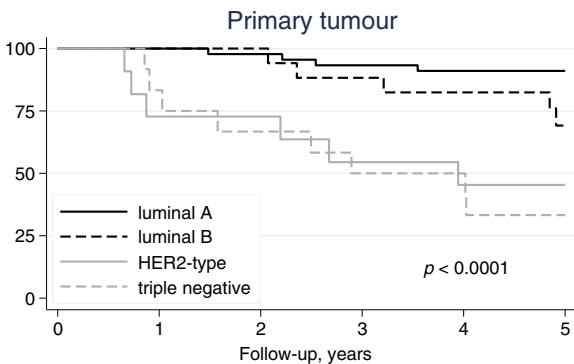

Number at risk

|                 |    |    |    |    |    |    |
|-----------------|----|----|----|----|----|----|
| luminal A       | 45 | 45 | 44 | 42 | 39 | 35 |
| luminal B       | 17 | 17 | 17 | 15 | 14 | 10 |
| HER2-type       | 11 | 8  | 8  | 6  | 5  | 5  |
| triple negative | 12 | 10 | 8  | 6  | 6  | 4  |
